# Supplementary material for: Prevention and Therapy of Metastatic HER-2+ Mammary Carcinoma with a Human Candidate HER-2 Virus-like Particle Vaccine
Source: MDPI journal article supplement (doi:10.3390/biomedicines10102654), 2022-10-20
Supplement: s1 [file s1]

## Supplementary Figure S1

**QD**

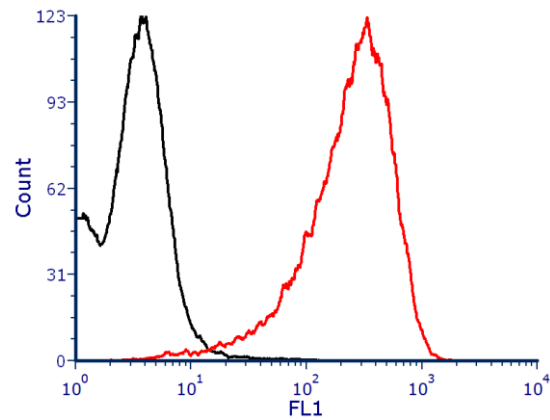

**BT-474**

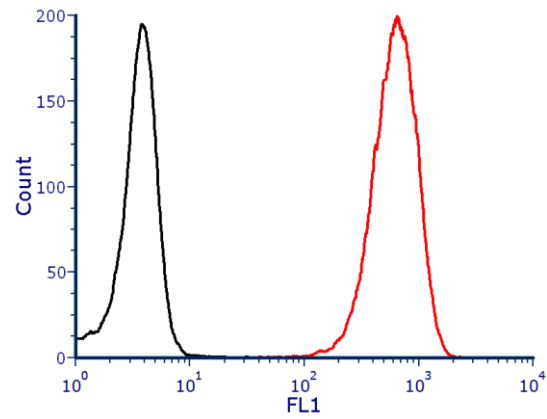

**BT-474-C5**

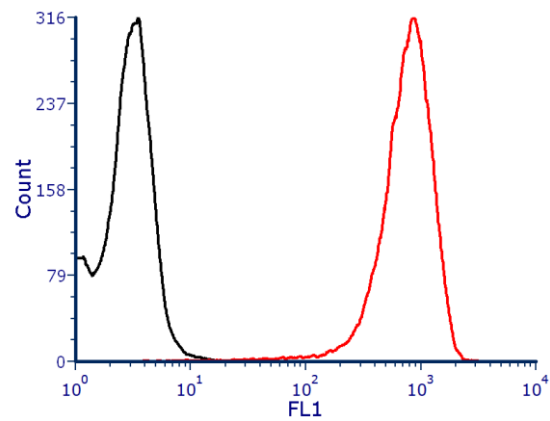

Supplementary Figure S1. HER-2 expression of human HER-2 transgenic mammary carcinoma cell line QD, of human breast cancer cell line BT-474 and of its trastuzumab-resistant clone C5, as determined by indirect immunofluorescence and flow cytometry. Red profile: anti-HER-2 monoclonal antibody MGR-2 + anti-mouse Ig AF488; black profile: anti-mouse Ig only.

Supplementary Figure S2

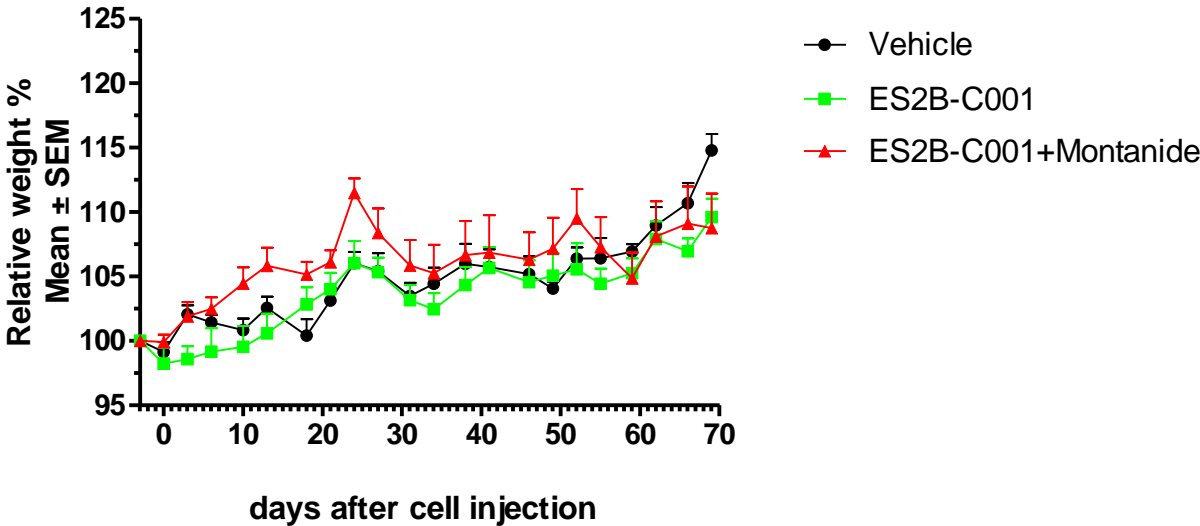

**Supplementary Figure S2.** Weight curves of FVB mice challenged i.m.f.p. with QD cells and vaccinated with ES2B-C001. See Figure 1 for tumor growth in these mice and Figures 3 and 4 for antibody kinetics.
